# Supplementary material for: The In Vitro Simulated Gastrointestinal Digestion Affects the Bioaccessibility and Bioactivity of Beta vulgaris Constituents
Source: MDPI journal article supplement (doi:10.3390/foods12020338), 2023-01-11
Supplement: s1 [file s1]

## Supplementary Material

---

### The *In Vitro* Simulated Gastrointestinal Digestion Affects the Bioaccessibility and Bioactivity of *Beta vulgaris* Constituents

Marta Igual, Ângela Fernandes, Maria Inês Dias, José Pinela, Purificación García-Segovia, Javier Martínez-Monzó, Lillian Barros

---

**Table S1.** Phases of the method used for simulated gastrointestinal digestion of beetroot.

| Phases                | Conditions                                                                                                                     |
|-----------------------|--------------------------------------------------------------------------------------------------------------------------------|
| Oral phase (GP)       | The sample was mixed with simulated salivary fluid (1:1) and amylase (75 U/mL) at pH 7 for 2 min.                              |
| Gastric phase (GP)    | The oral bolus was mixed with simulated gastric fluid (1:1), pepsin (2,000 U/mL) and gastric lipase (60 U/mL) at pH 3 for 2 h. |
| Intestinal phase (IP) | The gastric chime was mixed with simulated intestinal fluid (1:1) and pancreatin (Trypsin activity 100 U/mL) at pH 7 for 2 h.  |
| Digested (D) sample   | The mixture was centrifugated at 4500 rpm for 30 min and then filtered through a 1 µm glass-fiber membrane.                    |

**Table S2.** Method, equipment and analytical conditions used in the analysis of minerals, organic acids and betacyanins.

|                                              | Minerals                                                                                                                                                                                                                                                                                                                                                                                   | Organic acids                                                                                                                                                                                                                                                                                                                                                                             | Betacyanins                                                                                                                                                                                                                                                                                                                                                                                                                                                                                                                                                                                                                                        |
|----------------------------------------------|--------------------------------------------------------------------------------------------------------------------------------------------------------------------------------------------------------------------------------------------------------------------------------------------------------------------------------------------------------------------------------------------|-------------------------------------------------------------------------------------------------------------------------------------------------------------------------------------------------------------------------------------------------------------------------------------------------------------------------------------------------------------------------------------------|----------------------------------------------------------------------------------------------------------------------------------------------------------------------------------------------------------------------------------------------------------------------------------------------------------------------------------------------------------------------------------------------------------------------------------------------------------------------------------------------------------------------------------------------------------------------------------------------------------------------------------------------------|
| <b>Method</b>                                | Inductively coupled plasma optical emission spectroscopy (ICP-OES).                                                                                                                                                                                                                                                                                                                        | Ultra-fast liquid chromatography with photodiode array detection (UFLC-PDA).                                                                                                                                                                                                                                                                                                              | High-performance liquid chromatograph with diode array detection/electrospray ionization mass spectrometry (HPLC-DAD-ESI/MS).                                                                                                                                                                                                                                                                                                                                                                                                                                                                                                                      |
| <b>Equipment &amp; Analytical Conditions</b> | An inductively coupled plasma optical emission spectrometer (700 Series ICP-OES; Agilent Technologies, Santa Clara, United States) equipped with an axial viewing and a charge-coupled device detector with a radiofrequency generator of 40 MHz, plasma gas flow rate of 15 L/min, auxiliary gas flow rate of 1.5 L/min, power of 1 kW and nebulizer gas (One Neb 2) pressure of 200 kPa. | An UFLC system (Shimadzu Corporation, Kyoto, Japan) with photodiode array detection (PDA) equipped with a SphereClone reverse-phase C18 column (5 $\mu$ m particle size, 250 $\times$ 4.6 mm) (Phenomenex, Torrance, CA) thermostated at 35 $^{\circ}$ C was used for compounds separation. The mobile phase consisted of a sulfuric acid solution (3.6 mM) at a flow rate of 0.8 mL/min. | An HPLC (Dionex Ultimate 3000 HPLC, Thermo Scientific, San Jose, CA, USA) system and a Linear Ion Trap LTQ XL MS (Thermo Finnigan, San Jose, CA, USA) MS equipped with an ESI source. Separation was performed on a Waters Spherisorb S3 ODS-2 C18 column (3 $\mu$ m, 4.6 mm $\times$ 150 mm, Waters, Milford, MA, USA) thermostatted at 35 $^{\circ}$ C. The solvents ((A) 0.1% trifluoroacetic acid (TFA) in water, (B) acetonitrile) were used as follows: 10% B for 3 min, from 10 to 15% B for 12 min, 15% B for 5 min, from 15 to 18% B for 5 min, from 18 to 30% B for 20 min, from 30 to 35% B for 5 min, and from 35 to 10% B for 10 min. |

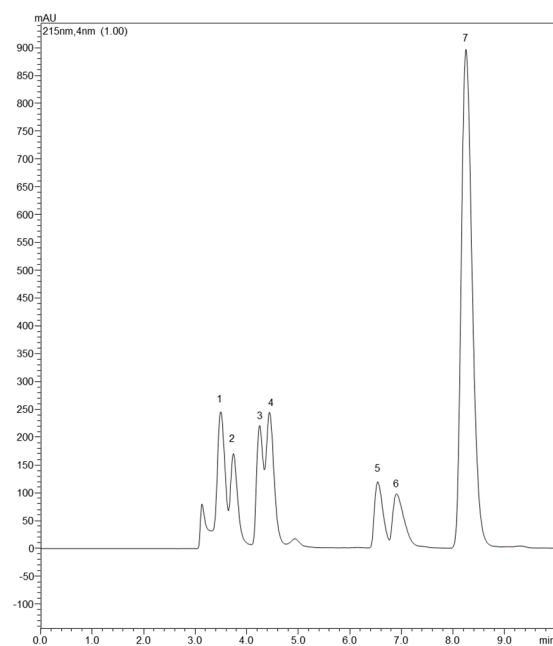

**Figure S1.** UFLC profile of commercial organic acid standards recorded at 215 nm. Peak identification: 1- oxalic acid; 2- quinic acid; 3- malic acid; 4- shikimic acid; 5- citric acid; 6- succinic acid; and 7- fumaric acid.

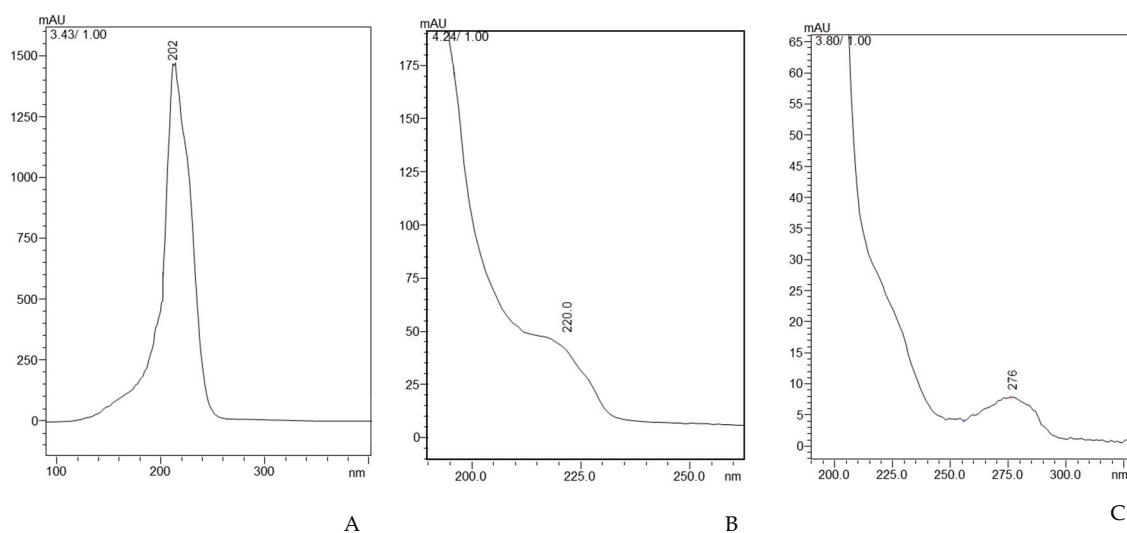

**Figure S2.** Maximum UV-Vis absorption spectrum (recorded at 215 nm) of oxalic acid (A), quinic acid (B), and malic acid (D).

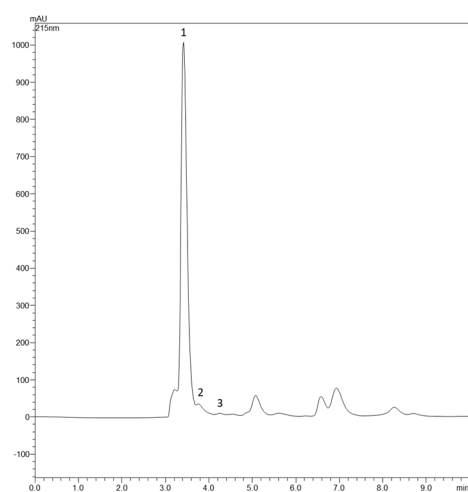

A

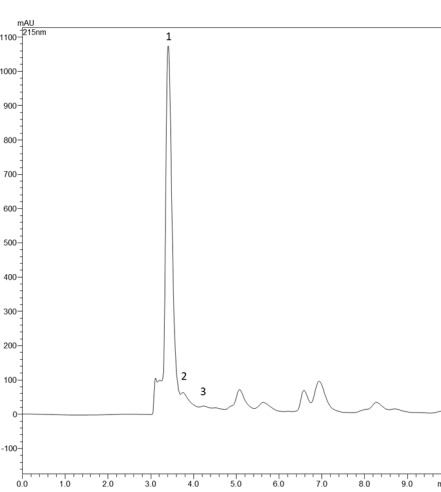

B

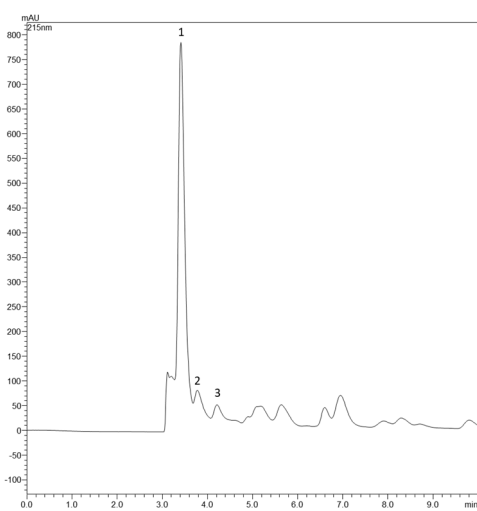

C

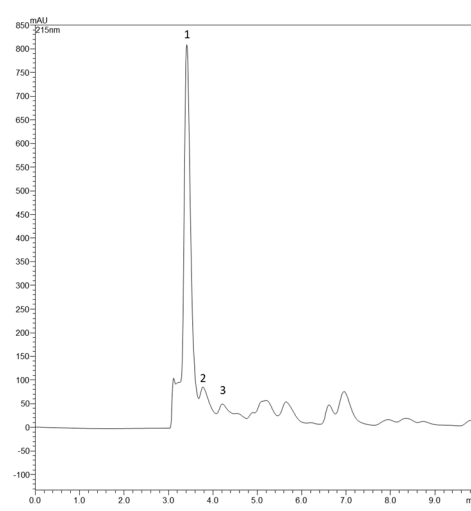

D

**Figure S3.** UFLC organic acid profile of beetroot (A), gastric phase (B), intestinal phase (C), and digested (D) sample recorded at 215 nm. Peak identification: 1- oxalic acid; 2- quinic acid; and 3- malic acid.

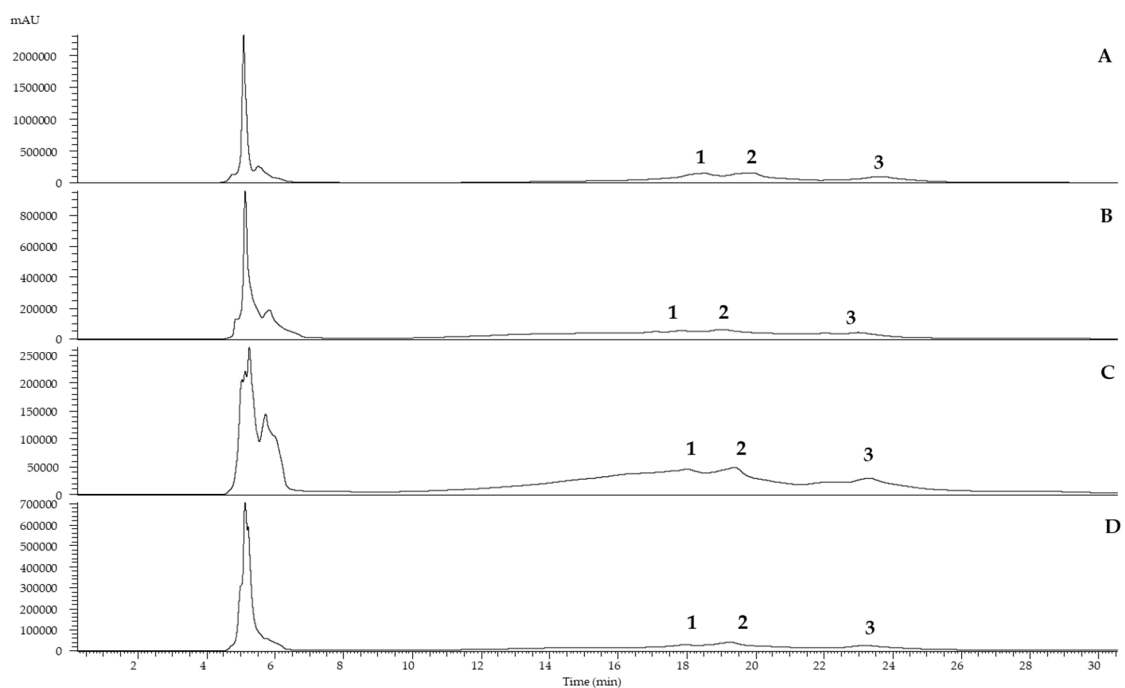

**Figure S4.** HPLC chromatographic profile of betacyanins in beetroot (A), gastric phase (B), intestinal phase (C), and digested (D) sample recorded at 535 nm. Peak identification: 1- betanidin-5-*O*-glucoside (betanin); 2- isobetanidin-5-*O*-glucoside (isobetanin); and 3- 14,15-dehydrobetanin (neobetanin).

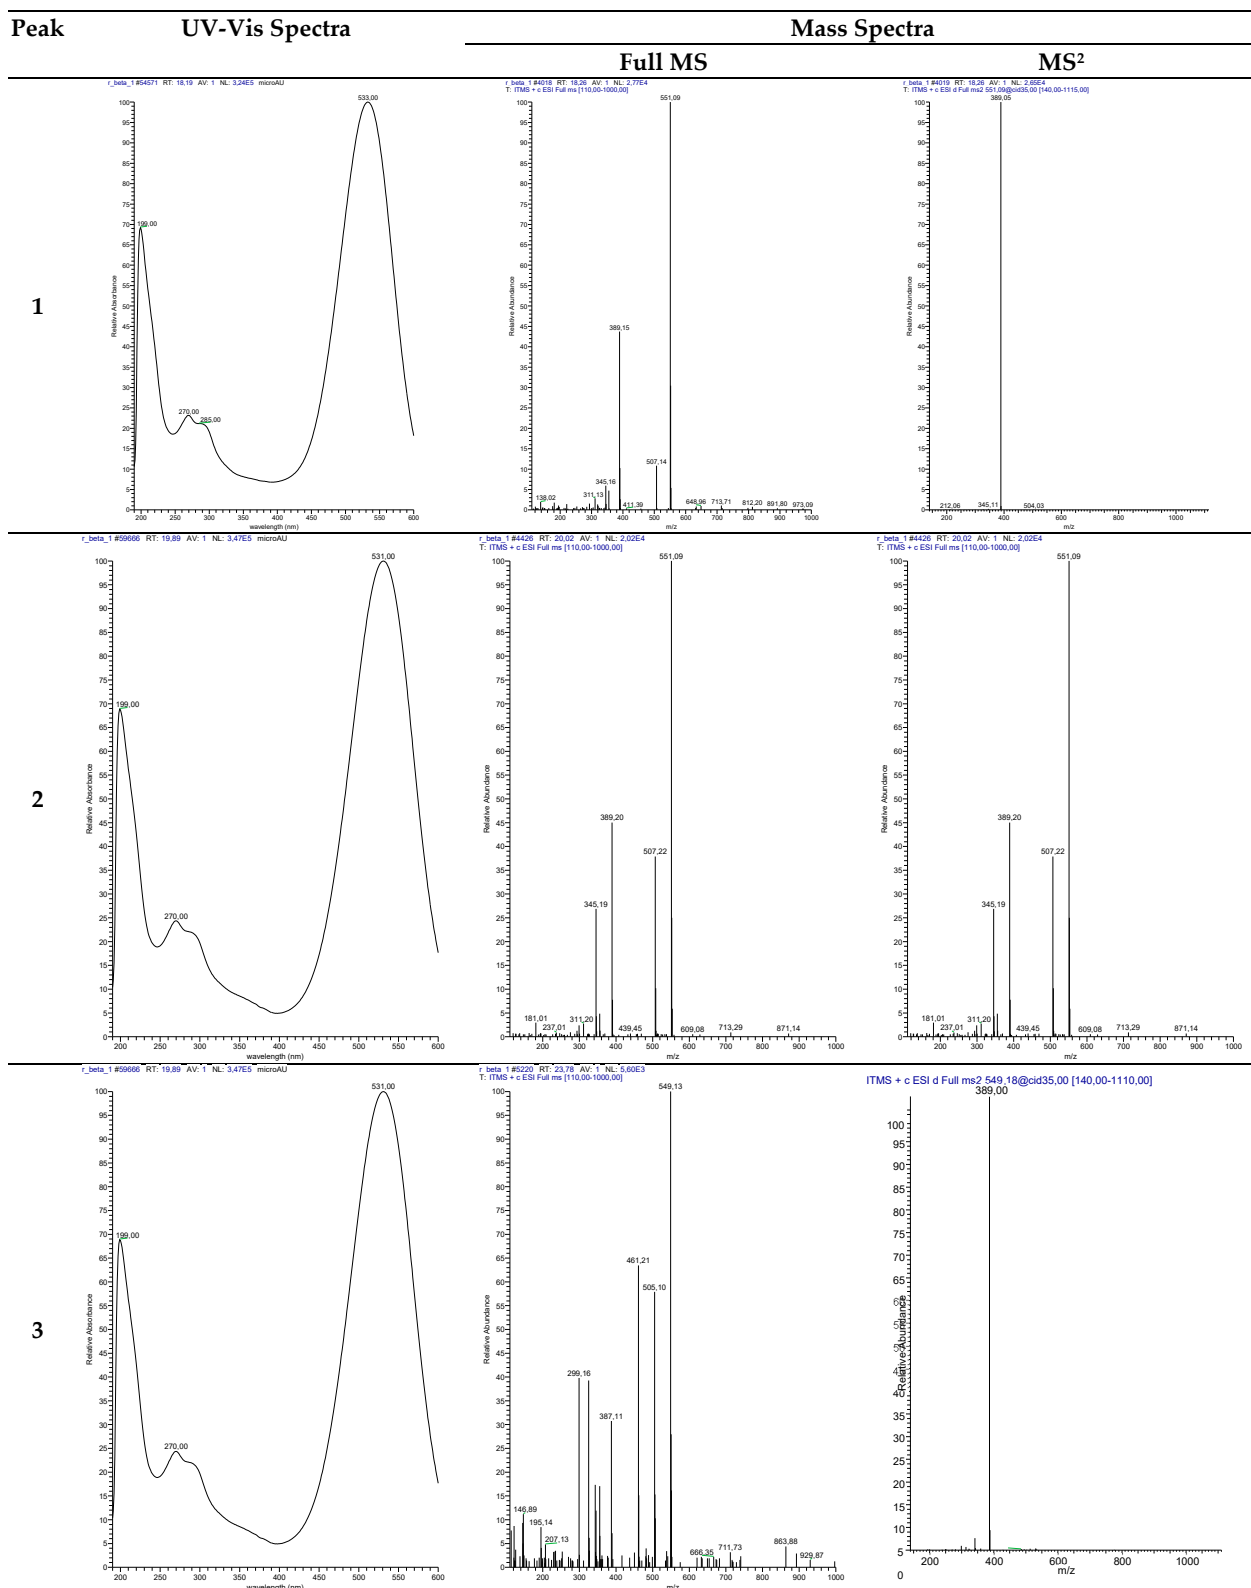

**Figure S5.** Maximum absorption spectrum (recorded at 535 nm) and mass spectrum (full MS and MS<sup>2</sup>), obtained by HPLC-DAD-ESI/MS<sup>n</sup>, of the three betacyanins identified in the beetroot samples. Peak identification: 1- betanidin-5-*O*-glucoside (betanin); 2- isobetanidin-5-*O*-glucoside (isobetanin); and 3- 14,15-dehydrobetanin (neobetanin).
